# Supplementary material for: Trinuclear copper(ii) pyrazolate compounds: a long story of serendipitous discoveries and rational design
Source: Royal Society of Chemistry journal article supplement (doi:10.1039/c7ce00009j), 2017-01-01
Supplement: c7ce00009j1.pdf [file c7ce00009j1.pdf]

| Entry | Identifier | Compound Name                                                                                                                                                                                                                 | Ref |
|-------|------------|-------------------------------------------------------------------------------------------------------------------------------------------------------------------------------------------------------------------------------|-----|
| 1     | HAWBIS     | catena-(( $\mu_6$ -benzene-1,3,5-tricarboxylato)-( $\mu_3$ -hydroxido)-( $\mu_3$ -oxido)-hexakis( $\mu$ -pyrazolato-N,N'))-hexa-copper(ii)                                                                                    | 30  |
| 2     | QUSMIB     | ( $\mu_3$ -hydroxido)-tris( $\mu$ -pyrazolato-N,N')-tris(1H-pyrazole)-tri-copper(ii) ( $\mu_3$ -oxido)-tris( $\mu$ -pyrazolato-N,N')-tris(1H-pyrazole)-tri-copper(ii)bis(trifluoromethanesulfonato) trifluoromethanesulfonate | 31  |
| 3     | KEWRAG     | bis(triphenylphosphine)iminium bis( $\mu_3$ -oxido)-tris( $\mu$ -3,5-diphenylpyrazolato-N,N')-hexakis( $\mu$ -pyrazolato-N,N')-hexa-copper(ii)                                                                                | 32  |
| 4     | NESQOS     | tetra-n-butylammonium ( $\mu_3$ -oxido)-tris( $\mu$ -pyrazolato-N,N')-(benzoato-O)-tri-copper(ii)                                                                                                                             | 33  |
| 5     | XOBCEW01   | bis(bis(triphenylphosphine)iminium) ( $\mu_3$ -oxido)-tris( $\mu$ -pyrazolato-N,N')-trichlorido-tri-copper(ii)                                                                                                                | 34  |
| 6     | RUYGIB     | tetra-n-butylammonium ( $\mu_3$ -hydroxido)-tris( $\mu$ -pyrazolato-N,N')-trichlorido-tri-copper(ii)                                                                                                                          | 34  |
| 7     | RUYHEY     | triethylammonium ( $\mu_3$ -hydroxido)-tris( $\mu$ -pyrazolato-N,N')-(1H-pyrazole)-trichlorido-tri-copper(ii)                                                                                                                 | 34  |
| 8     | LUDZIV     | bis(tetra-n-butylammonium) octakis( $\mu$ -hydroxido)-octadecakis( $\mu$ -pyrazolato-N,N')-pentadeca-copper diphosphate bromobenzene nitrobenzene solvate                                                                     | 35  |
| 9     | LUDZOB     | bis(tetra-n-butylammonium) octakis( $\mu$ -hydroxido)-octadecakis( $\mu$ -pyrazolato-N,N')-pentadeca-copper diarsenate bromobenzene nitrobenzene solvate                                                                      | 35  |
| 10    | MAFBOL     | bis(tetrabutylammonium) bis(( $\mu_3$ -hydroxido)-( $\mu$ -acetato-O,O)-bis(acetato-O)-tris( $\mu$ -pyrazolato-N,N')-tri-copper(ii)) hexahydrate                                                                              | 36  |
| 11    | XOKWUQ     | bis(tetra-n-butylammonium) bis( $\mu_3$ -hydroxido)-hexakis( $\mu$ -pyrazolato-N,N')-bis( $\mu$ -thiocyanato-N,S)-tetrakis(isothiocyanato)-hexa-copper(ii)                                                                    | 37  |
| 12    | XEMYEV     | bis(triethylammonium) bis( $\mu_3$ -hydroxido)-bis( $\mu$ -acetato-O)-hexakis( $\mu$ -pyrazolato-N,N')-tetrakis(acetato-O)-hexa-copper(ii) benzene solvate                                                                    | 38  |
| 13    | RUYGEX     | bis(triphenylphosphine)iminium ( $\mu_3$ -hydroxido)-tris( $\mu$ -pyrazolato-N,N')-trichlorido-tri-copper(ii) tetrahydrofuran dichloromethane solvate                                                                         | 34  |
| 14    | MAFBEB     | bis(triphenylphosphino)iminium ( $\mu_3$ -hydroxido)-tris(( $\mu$ -pyrazolato-N,N')-(isocyanato))-tri-copper(ii)                                                                                                              | 36  |
| 15    | MAFBIF     | bis(bis(triphenylphosphino)iminium) bis(( $\mu_3$ -hydroxido)-( $\mu$ -acetato-O,O)-aqua-bis(acetato-O)-tris( $\mu$ -pyrazolato-N,N')-tri-copper(ii)) dihydrate                                                               | 36  |
| 16    | DIBXES     | bis( $\mu_3$ -hydroxido)-bis( $\mu$ -acetato-O,O)-hexakis( $\mu$ -pyrazolato-N,N')-tetrakis(1H-pyrazole)-hexa-copper(ii) dichloride dihydrate                                                                                 | 39  |
| 17    | YUYGUW     | bis( $\mu_3$ -hydroxido)-hexakis( $\mu$ -pyrazolato-N,N')-bis( $\mu$ -chloroacetato)-tetrakis(1H-pyrazole)-hexa-copper bis(chloride)                                                                                          | 40  |
| 18    | KEBBUQ     | bis( $\mu_3$ -hydroxido)-hexakis( $\mu$ -pyrazolato-N,N')-bis( $\mu$ -4,4'-bipyridine)-diaqua-tetrakis(4,4'-bipyridine)-bis(formato)-hexa-copper(ii) dihydroxide 4,4'-bipyridine                                              | 41  |
| 19    | KEBCAX     | bis( $\mu_3$ -hydroxido)-hexakis( $\mu$ -pyrazolato-N,N')-bis( $\mu$ -4,4'-bipyridine)-diaqua-tetrakis(4,4'-bipyridine)-bis(formato)-hexa-copper(ii) dihydroxide benzene solvate                                              | 41  |
| 20    | KEBCIF     | bis( $\mu_3$ -hydroxido)-hexakis( $\mu$ -pyrazolato-N,N')-bis( $\mu$ -4,4'-bipyridine)-diaqua-tetrakis(4,4'-bipyridine)-bis(formato)-hexa-copper(ii) dihydroxide hemikis(4,4'-bipyridine) cyclohexane solvate                 | 41  |
| 21    | KEBCUR     | bis( $\mu_3$ -hydroxido)-hexakis( $\mu$ -pyrazolato-N,N')-bis( $\mu$ -4,4'-bipyridine)-diaqua-tetrakis(4,4'-bipyridine)-bis(formato)-hexa-copper(ii) dihydroxide toluene solvate                                              | 41  |
| 22    | RUGLEM     | bis( $\mu$ -4,4'-bipyridine)-bis( $\mu_3$ -hydroxido)-hexakis( $\mu$ -pyrazolato-N,N')-bis(acetato)-diaqua-tetrakis(4,4'-bipyridine)-hexa-copper 4,4'-bipyridine dihydroxide dihydrate                                        | 42  |
| 23    | RUGLIQ     | bis( $\mu$ -4,4'-bipyridine)-bis( $\mu_3$ -hydroxido)-hexakis( $\mu$ -pyrazolato-N,N')-bis(acetato)-diaqua-tetrakis(4,4'-bipyridine)-hexa-copper 4,4'-bipyridine dihydroxide tetrahydrate                                     | 42  |
| 24    | XOKXAX     | ( $\mu_3$ -hydroxido)-tris( $\mu$ -pyrazolato-N,N')-tris(pyridine-N)-tri-copper(ii) (trifluoromethanesulfonato) trifluoromethanesulfonate acetone solvate                                                                     | 37  |
| 25    | MUZRIJ     | catena-[bis( $\mu_3$ -hydroxido)-tris( $\mu$ -4,4'-bipyridine-N,N')-hexakis( $\mu$ -pyrazolato-N,N')-hexa-copper(ii) tetrakis(trifluoromethanesulfonate) hexahydrate]                                                         | 43  |
| 26    | VIMYEX     | ( $\mu_3$ -hydroxido)-( $\mu$ -chlorido)-tris( $\mu$ -pyrazolato-N,N')-(aqua)-tris(1H-pyrazole)-tri-copper dicyano(nitro)methanide monohydrate                                                                                | 44  |
| 27    | BOFLEP     | ( $\mu_3$ -hydroxido)-tris( $\mu$ -pyrazolato-N,N')-tetrakis(1H-pyrazole)-bis(nitrato)-di-copper monohydrate                                                                                                                  | 45  |
| 28    | BOZBIB     | catena-( $\mu_3$ -nitrato-O,O',O'')-( $\mu_3$ -hydroxido)-1-nitrato-1,2:1,3:2,3-tris( $\mu$ -pyrazolato-N,N')-2,3-bis(1H-pyrazole)-tri-copper(ii) monohydrate                                                                 | 46  |
| 29    | MINZIU     | ( $\mu_3$ -hydroxido)-tris( $\mu$ -pyrazolato-N,N')-( $\mu$ -nitrato)-tris(pyridine)-(nitrato)-tri-copper                                                                                                                     | 47  |
| 30    | ZOQGOB     | bis(( $\mu_3$ -hydroxido)-( $\mu_3$ -nitrato-O,O')-( $\mu$ -nitrato-O,O')-tris( $\mu$ -pyrazolato-N,N')-tris(pyrazol-2-yl))-hexa-copper(ii)                                                                                   | 48  |
| 31    | DIBXIW     | catena-(bis( $\mu_3$ -chlorido)-bis( $\mu_3$ -hydroxido)-hexakis( $\mu$ -pyrazolato-N,N')-diaqua-tetrachlorido-hexakis(1H-pyrazole)-hepta-copper(ii))                                                                         | 39  |
| 32    | DIBXOC     | bis( $\mu_3$ -hydroxido)-bis( $\mu$ -chlorido)-hexakis( $\mu$ -pyrazolato-N,N')-dichlorido-hexakis(1H-                                                                                                                        | 39  |

|    |        |                                                                                                                                                                                                                                                              |    |
|----|--------|--------------------------------------------------------------------------------------------------------------------------------------------------------------------------------------------------------------------------------------------------------------|----|
|    |        | pyrazole)-hexa-copper(ii) monohydrate                                                                                                                                                                                                                        |    |
| 33 | QIMSIQ | ( $\mu_3$ -hydroxido)-tris( $\mu$ -pyrazolato-N,N')-bis(1H-pyrazole)-(N,N-dimethylformamide)-dichlorido-tri-copper ( $\mu_3$ -hydroxido)-( $\mu$ -chlorido)-tris( $\mu$ -pyrazolato-N,N')-bis(1H-pyrazole)-chlorido-tri-copper N,N-dimethylformamide solvate | 49 |
| 34 | SIJKOL | ( $\mu_3$ -hydroxido)-tris( $\mu$ -pyrazolato-N,N')-( $\mu$ -chlorido)-chlorido-bis(pyridyl)-tri-copper(ii) pyridine solvate                                                                                                                                 | 50 |
| 35 | BOLXEH | catena-(( $\mu_3$ -hydroxido)-bis( $\mu$ -bromido)-tris( $\mu$ -pyrazolato-N,N')-tetrahydrofuran-tri-copper tetrahydrofuran solvate)                                                                                                                         | 51 |
| 36 | QOPJIP | bis( $\mu_3$ -perchlorato-O,O',O'')-bis( $\mu_3$ -hydroxido)-bis( $\mu$ -perchlorato-O,O')-hexakis( $\mu$ -pyrazolato-N,N')-hexakis(1H-pyrazole)-hexa-copper(ii) ethanol methanol solvate dihydrate                                                          | 52 |
| 37 | QUSLOG | bis( $\mu_3$ -hydroxido)-bis( $\mu_3$ -perchlorato-O,O',O'')-bis( $\mu$ -perchlorato-O,O')-hexakis( $\mu$ -pyrazolato-N,N')-hexakis(1H-pyrazole)-hexa-copper(ii)                                                                                             | 31 |
| 38 | QUSMUN | ( $\mu_3$ -hydroxido)-( $\mu_3$ -trifluoromethanesulfonato-O,O',O'')-tris( $\mu$ -pyrazolato-N,N')-tris(1H-pyrazole)-(trifluoromethanesulfonato-O)-tri-copper(ii) monohydrate                                                                                | 31 |
| 39 | MUZQUU | ( $\mu_3$ -hydroxido)-tris( $\mu$ -pyrazolato-N,N')-( $\mu$ -trifluoromethanesulfonato-O,O')-tripyridine-(trifluoromethanesulfonato-O)-tri-copper(ii) hemihydrate                                                                                            | 43 |
| 40 | MUZRAB | bis( $\mu_3$ -hydroxido)-( $\mu$ -4,4'-bipyridine-N,N')-hexakis( $\mu$ -pyrazolato-N,N')-tetrapyridine-hexa-copper(ii) tetrakis(trifluoromethanesulfonato)                                                                                                   | 43 |
| 41 | MUZREF | catena-[bis( $\mu_3$ -hydroxido)-bis( $\mu$ -4,4'-bipyridine-N,N')-hexakis( $\mu$ -pyrazolato-N,N')-dipyridine-hexa-copper(ii) tetrakis(trifluoromethanesulfonato) monohydrate]                                                                              | 43 |
| 42 | QUSLEW | ( $\mu_3$ -hydroxido)-tris( $\mu$ -pyrazolato-N,N')-( $\mu$ -sulfato-O,O')-tris(1H-pyrazole)-tri-copper(ii) monohydrate                                                                                                                                      | 31 |
| 43 | MINZOA | octakis( $\mu$ -4-methylphenyl)phosphonato)-octakis( $\mu$ -hydroxido)-dodecakis( $\mu$ -pyrazolato-N,N')-diaqua-tetrapyridine-octadeca-copper acetonitrile unknown solvate tetrahydrate                                                                     | 47 |
| 44 | DOKKAQ | catena-(( $\mu_6$ -sulfato)-bis( $\mu_3$ -hydroxido)-hexakis( $\mu$ -pyrazolato-N,N)-bis( $\mu$ -nitrate)-hexakis(1H-pyrazole)-hexa-copper acetonitrile methanol solvate sesquihydrate)                                                                      | 53 |
| 45 | KEBBOK | catena-(tetrakis( $\mu_3$ -hydroxido)-dodecakis( $\mu$ -pyrazolato-N,N')-( $\mu$ -4,4'-bipyridine)-tetrakis( $\mu$ -formato)-diaqua-tetrakis(formato)-dodeca-copper(ii) decahydrate)                                                                         | 41 |
| 46 | KEBDEC | catena-(bis( $\mu_3$ -hydroxido)-hexakis( $\mu$ -pyrazolato-N,N')-( $\mu$ -4,4'-bipyridine)-bis( $\mu$ -formato)-diaqua-bis(4,4'-bipyridine)-bis(formato)-hexa-copper(ii) dihydrate)                                                                         | 41 |
| 47 | JAVGAP | catena-(( $\mu_3$ -hydroxido)-( $\mu$ -formato)-tris( $\mu$ -pyrazolato-N,N')-formato-bis(1H-pyrazole)-tri-copper(ii) monohydrate)                                                                                                                           | 54 |
| 48 | RUGKUB | catena-[bis( $\mu$ -acetato)-bis( $\mu$ -4,4'-bipyridine)-bis( $\mu_3$ -hydroxido)-hexakis( $\mu$ -pyrazolato-N,N')-bis(acetato)-hexa-copper methanol solvate monohydrate]                                                                                   | 42 |
| 49 | RUGLAI | catena-[bis( $\mu$ -4,4'-bipyridine)-( $\mu_3$ -hydroxido)-tris( $\mu$ -pyrazolato-N,N')-bis(acetato)-aqua-tri-copper 4,4'-bipyridine methanol solvate tetrahydrate]                                                                                         | 42 |
| 50 | LAHYUP | catena-[( $\mu_3$ -acetato)-( $\mu_3$ -hydroxido)-( $\mu$ -acetato)-tris( $\mu$ -pyrazolato-N,N')-(1H-pyrazole)-tri-copper(ii)]                                                                                                                              | 55 |
| 51 | QUSMEX | ( $\mu_3$ -hydroxido)-tris( $\mu$ -pyrazolato-N,N')-( $\mu$ -trifluoroacetato-O,O')-bis(1H-pyrazole)-(trifluoroacetato-O)-tri-copper(ii)                                                                                                                     | 31 |
| 52 | JEWWEO | ( $\mu_3$ -hydroxido)-tris( $\mu$ -pyrazolato-N,N')-aqua-bis(propionato)-tri-copper(ii) monohydrate                                                                                                                                                          | 7  |
| 53 | JEWWIS | ( $\mu_3$ -hydroxido)-tris( $\mu$ -pyrazolato-N,N')-aqua-bis(propionato)-tri-copper(ii)                                                                                                                                                                      | 7  |
| 54 | RUGLUC | catena-[bis( $\mu$ -4,4'-bipyridine)-bis( $\mu_3$ -hydroxido)-bis( $\mu$ -propanoato)-hexakis( $\mu$ -pyrazolato-N,N')-bis(propanoato)-hexa-copper dihydrate]                                                                                                | 42 |
| 55 | JAVGET | catena-(( $\mu_3$ -hydroxido)-( $\mu$ -propionato-O,O)-( $\mu$ -propionato-O,O')-tris( $\mu$ -pyrazolato-N,N')-ethanol-tri-copper(ii))                                                                                                                       | 54 |
| 56 | JAVGIX | bis(( $\mu_3$ -hydroxido)-( $\mu$ -butyrato)-tris( $\mu$ -pyrazolato-N,N')-aqua-butyrate-methanol-tri-copper(ii))                                                                                                                                            | 54 |
| 57 | HUTZED | catena-[( $\mu_3$ -hydroxido)-tris( $\mu$ -pyrazolato-N,N')-( $\mu$ -4,4'-bipyridine)-( $\mu$ -valerato)-(valerato)-methanol-tri-copper]                                                                                                                     | 56 |
| 58 | HUTZON | catena-[( $\mu_3$ -hydroxido)-( $\mu$ -4,4'-bipyridine)-tris( $\mu$ -pyrazolato-N,N')-( $\mu$ -hexanoato)-(hexanoato)-aqua-tri-copper]                                                                                                                       | 56 |
| 59 | FUPYOG | catena-[bis( $\mu_3$ -hydroxido)-bis( $\mu$ -heptanoato)-(4,4'-bipyridine)-hexakis( $\mu$ -pyrazolato-N,N')-bis(heptanoato)-hexa-copper]                                                                                                                     | 56 |
| 60 | RUGMEN | catena-[( $\mu$ -4,4'-bipyridine)-( $\mu_3$ -hydroxido)-( $\mu$ -acrylato)-tris( $\mu$ -pyrazolato-N,N')-(acrylato)-aqua-tri-copper]                                                                                                                         | 42 |
| 61 | RUGMOX | catena-[( $\mu$ -4,4'-bipyridine)-( $\mu_3$ -hydroxido)-tris( $\mu$ -pyrazolato-N,N')-(acrylato-O)-(acrylato-O,O')-(4,4'-bipyridine)-(1H-pyrazole)-tri-copper dihydrate]                                                                                     | 42 |
| 62 | XUCRET | bis( $\mu_3$ -hydroxido)-bis( $\mu$ -acrylato-O,O)-hexakis( $\mu$ -pyrazolato-N,N')-bis(acrylato-O,O')-tetra-aqua-bis(1H-pyrazole)-hexa-copper(ii)                                                                                                           | 57 |
| 63 | XUCRIX | catena-(( $\mu_3$ -hydroxido)-( $\mu$ -acrylato-O,O')-( $\mu$ -acrylato-O,O)-tris( $\mu$ -pyrazolato-N,N')-methanol-tri-copper(ii))                                                                                                                          | 57 |

|                 |          |                                                                                                                                                                                                                                                                        |    |
|-----------------|----------|------------------------------------------------------------------------------------------------------------------------------------------------------------------------------------------------------------------------------------------------------------------------|----|
| 64              | XUCROD   | catena-(( $\mu_3$ -hydroxido)-bis( $\mu$ -methacrylato-O,O'))-tris( $\mu$ -pyrazolato-N,N')-tri-copper(ii)                                                                                                                                                             | 57 |
| 65 <sup>a</sup> | 1454767  | ( $\mu_3$ -hydroxido)-tris( $\mu$ -pyrazolato-N,N')-bis(pivalato)-(1H-pyrazole)-bis(pivalic acid)-tri-copper(ii)                                                                                                                                                       | 58 |
| 66 <sup>a</sup> | 1454763  | catena-(( $\mu_3$ -hydroxido)-bis( $\mu$ -phenylacetato-O,O'))-tris( $\mu$ -pyrazolato-N,N')-tri-copper(ii)                                                                                                                                                            | 58 |
| 67 <sup>a</sup> | 1454764  | catena-(( $\mu_3$ -hydroxido)-( $\mu_3$ -vinylacetato)-( $\mu$ -vinylacetato))-tris( $\mu$ -pyrazolato-N,N')-tri-copper(ii)                                                                                                                                            | 58 |
| 68 <sup>a</sup> | 1454765  | bis(( $\mu_3$ -hydroxido)-( $\mu_3$ -phenylpropanoato)-( $\mu$ -phenylpropanoato))-tris( $\mu$ -pyrazolato-N,N')-tri-copper(ii)-bis(( $\mu_3$ -hydroxido)-( $\mu_3$ -phenylpropanoato)-( $\mu$ -phenylpropanoato))-tris( $\mu$ -pyrazolato-N,N')-diaqua-tri-copper(ii) | 58 |
| 69 <sup>a</sup> | 1454766  | catena-(( $\mu_3$ -hydroxido)-bis( $\mu$ -cyclohexylcarboxylato-O,O'))-tris( $\mu$ -pyrazolato-N,N')-tri-copper(ii)                                                                                                                                                    | 58 |
| 70              | DEGBAU   | bis( $\mu_3$ -hydroxido)-tetrakis( $\mu$ -hydroxido)-hexadecakis( $\mu$ -pyrazolato-N,N')-bis(isocyanato)-dodeca-copper methanol solvate                                                                                                                               | 59 |
| 71              | TAZWOI   | catena-[( $\mu_3$ -fumarato)-( $\mu_3$ -hydroxido)-tris( $\mu$ -pyrazolato-N,N')-(1H-pyrazole)-tri-copper(ii)]                                                                                                                                                         | 60 |
| 72              | TAZWUO   | catena-[( $\mu_3$ -2-methylfumarato)-( $\mu_3$ -hydroxido)-tris( $\mu$ -pyrazolato-N,N')-(1H-pyrazole)-tri-copper(ii)]                                                                                                                                                 | 60 |
| 73              | CENJIQ   | catena-(( $\mu_3$ -succinato)-( $\mu_3$ -hydroxido)-tris( $\mu$ -pyrazolato-N,N')-aqua-(methanol)-tri-copper monohydrate unknown solvate)                                                                                                                              | 61 |
| 74              | CENKAJ   | catena-(( $\mu_3$ -succinato)-( $\mu_3$ -hydroxido)-tris( $\mu$ -pyrazolato-N,N')-triaqua-tri-copper hemihydrate unknown solvate)                                                                                                                                      | 61 |
| 75              | CENKEN   | catena-(( $\mu_4$ -succinato)-( $\mu_3$ -hydroxido)-tris( $\mu$ -pyrazolato-N,N')-tri-copper)                                                                                                                                                                          | 61 |
| 76 <sup>b</sup> | QOJZEW01 | catena-[( $\mu$ -2-hydroxynaphthalene-1,4-dicarboxylato)-( $\mu_3$ -hydroxido)-tris( $\mu$ -pyrazolato-N,N')-tri-copper N,N-dimethylformamide methanol solvate monohydrate]                                                                                            | 62 |
| 77 <sup>b</sup> | QOJZIA01 | catena-[( $\mu$ -biphenyl-4,4'-dicarboxylato)-( $\mu_3$ -hydroxido)-tris( $\mu$ -pyrazolato-N,N')-diaqua-tri-copper]                                                                                                                                                   | 62 |
| 78 <sup>b</sup> | QOKCOK01 | catena-(( $\mu_3$ -oxido)-( $\mu_3$ -pyridine-3,4-dicarboxylato))-tris( $\mu$ -pyrazolato-N,N')-diaqua-methanol-tri-copper unknown solvate)                                                                                                                            | 62 |
| 79              | HUXWUU   | tris( $\mu$ -3,5-diphenylpyrazolato-N,N')-( $\mu_6$ -fluoro)-bis( $\mu_3$ -hydroxido)-hexakis( $\mu$ -pyrazolato-N,N')-hexa-copper(ii) unknown solvate                                                                                                                 | 63 |
| 80              | KEBBEA   | catena-(( $\mu_3$ -methoxido)-tris( $\mu$ -pyrazolato-N,N')-( $\mu$ -4,4'-bipyridine)-( $\mu$ -formato)-(formato)-tri-copper(ii) methanol solvate)                                                                                                                     | 41 |
| 81              | FUPYIA   | catena-[bis( $\mu$ -methoxido)-bis( $\mu$ -butanoato)-hexakis( $\mu$ -pyrazolato-N,N')-bis( $\mu$ -4,4'-bipyridine)-bis(butyrate)-hexa-copper]                                                                                                                         | 56 |
| 82              | HUTZIH   | catena-[bis( $\mu_3$ -methoxido)-bis( $\mu$ -4,4'-bipyridine)-bis( $\mu$ -hexanoato)-hexakis( $\mu$ -pyrazolato-N,N')-bis(hexanoato)-hexa-copper]                                                                                                                      | 56 |

<sup>a</sup> For compounds **65-69** reported in ref. 58 the CCDC deposit numbers are indicated. <sup>b</sup> Atomic coordinates of compounds **76-78** (QOJZEW01, QOJZIA01 and QOKCOK01) (ref. 62) can be retrieved from the corresponding QOJZEW, QOJZIA and QOKCOK files, reported in in the CCDC database as Personal Communication.
